# Supplementary material for: Histopathologic evaluation of postmortem autolytic changes in bluegill (Lepomis macrohirus) and crappie (Pomoxis anularis) at varied time intervals and storage temperatures
Source: PeerJ. 2016 Apr 19;4:e1943. doi: 10.7717/peerj.1943 (PMC4841231; doi:10.7717/peerj.1943)
Supplement: Data S2 — This spreadsheet provides details on the how and when the tissues were handled and processed. [file peerj-04-1943-s002.xlsx]

## Sheet: Sheet1
	Tissue Collection Study October 2012
Date	Time of Collection	Storage Method			Fish Body Temp (C)	Room Temp (C)	Comments
		Room Temp	Refrigerated	Frozen
2012-10-02	08:00:00	X			20.2	20	control group
2012-10-02	12:00:00	X			18.4	20	4 hour group
2012-10-02	12:00:00		X		13.4	20	4 hour group
2012-10-02	12:00:00			X	9.88	20	4 hour group
2012-10-02	20:00:00	X			18.7	20	12 hour group
2012-10-02	20:00:00		X		5.4	20	12 hour group
2012-10-02	20:00:00			X	1.72	20	12 hour group
2012-10-03	08:00:00	X			18.7	20	24 hour group
2012-10-03	08:00:00		X		3.1	20	24 hour group
2012-10-03	08:00:00			X	11.72	20	24 hour group
2012-10-04	08:00:00	X			18.2	18.89	48 hour group
2012-10-04	08:00:00		X		3.44	18.89	48 hour group
2012-10-04	08:00:00			X	-0.11	18.89	48 hour group
Notes:
1. All fish were euthanized using MS222 at a 215 ppm
2. Transport water the fish were euthanized in was 18.7 celcius
3. Fish were either bluegill (Lepomis macrochirus) or crappie (Pomoxis anularis)
4. Fish all averaged 12 ozs (340 grams)
5. Interesting note was various fish still had beating hearts even up to the 24 hour period regardless of the storing method
6. Defosted the frozen fish in cool water for approximately one hour
7. As time elapsed the fresh fish organs became less cohesive
8. The order that the tissues were harvested was: gills, skin, liver, gonads, stomach, intestings, pyloric ceca, spleen, gall bladder, gas bladder, posterior kidney, anterior kidney, heart, eye (whole).
